# Supplementary material for: Characterization of hepatic zonation in mice by mass-spectrometric and antibody-based proteomics approaches
Source: publisher site journal article supplement (doi:10.1515/hsz-2021-0314), 2021-10-04
Supplement: Supplementary file 2 [file j_hsz-2021-0314_suppl_003.xlsx]

## Sheet: Canonical Pathways
Canonical.Pathway	PP z-score	PV z-score	Zonation
Opioid Signaling Pathway	3.16228		PP
GNRH Signaling	3		PP
Adrenomedullin signaling pathway	2.82843	2.44949
Oxidative Phosphorylation	2.82843		PP
B Cell Receptor Signaling	2.64575	2.44949
Neuroinflammation Signaling Pathway	2.64575	2.44949
Cardiac Hypertrophy Signaling	2.64575	2.23607
NGF Signaling	2.64575	2.23607
Rac Signaling	2.64575	2	PP
Glioblastoma Multiforme Signaling	2.64575	1	PP
Integrin Signaling	2.64575	0.447214	PP
CXCR4 Signaling	2.64575		PP
Endothelin-1 Signaling	2.64575		PP
ErbB Signaling	2.64575		PP
Superpathway of Citrulline Metabolism	2.64575		PP
Acute Phase Response Signaling	2.44949	2.44949
EGF Signaling	2.44949	2.44949
HGF Signaling	2.44949	2.44949
IL-6 Signaling	2.44949	2.44949
RANK Signaling in Osteoclasts	2.44949	2.44949
IL-8 Signaling	2.44949	2.23607
Signaling by Rho Family GTPases	2.44949	2.23607
PDGF Signaling	2.44949	2
Renin-Angiotensin Signaling	2.44949	2
Ephrin Receptor Signaling	2.44949		PP
LPS-stimulated MAPK Signaling	2.44949		PP
Neuregulin Signaling	2.44949		PP
PAK Signaling	2.44949		PP
Salvage Pathways of Pyrimidine Ribonucleotides	2.44949		PP
STAT3 Pathway	2.44949		PP
TGF-β Signaling	2.44949		PP
NRF2-mediated Oxidative Stress Response	2.23607	3.16228	PV
Gα12/13 Signaling	2.23607	2.44949
IGF-1 Signaling	2.23607	2.44949
3-phosphoinositide Biosynthesis	2.23607	2.23607
Role of NFAT in Cardiac Hypertrophy	2.23607	2.23607
Superpathway of Inositol Phosphate Compounds	2.23607	2.23607
Ethanol Degradation II	2.23607	2
FLT3 Signaling in Hematopoietic Progenitor Cells	2.23607	2
Gαq Signaling	2.23607	2
Ovarian Cancer Signaling	2.23607	2
VEGF Signaling	2.23607	1	PP
Actin Cytoskeleton Signaling	2.23607		PP
Cdc42 Signaling	2.23607		PP
Cholecystokinin/Gastrin-mediated Signaling	2.23607		PP
Corticotropin Releasing Hormone Signaling	2.23607		PP
Endometrial Cancer Signaling	2.23607		PP
Isoleucine Degradation I	2.23607		PP
Melanocyte Development and Pigmentation Signaling	2.23607		PP
Thrombin Signaling	2.23607		PP
TNFR1 Signaling	2.23607		PP
Urea Cycle	2.23607		PP
Pancreatic Adenocarcinoma Signaling	2	2.64575	PV
Acute Myeloid Leukemia Signaling	2	2.23607
Dendritic Cell Maturation	2	2.23607
FGF Signaling	2	2.23607
HMGB1 Signaling	2	2.23607
IL-3 Signaling	2	2.23607
Tec Kinase Signaling	2	2.23607
ErbB2-ErbB3 Signaling	2	2
ERK5 Signaling	2	2
P2Y Purigenic Receptor Signaling Pathway	2	2
p70S6K Signaling	2	2
Paxillin Signaling	2	2
Renal Cell Carcinoma Signaling	2	2
Neurotrophin/TRK Signaling	2	1.34164	PP
3-phosphoinositide Degradation	2		PP
Agrin Interactions at Neuromuscular Junction	2		PP
BMP signaling pathway	2		PP
CCR3 Signaling in Eosinophils	2		PP
Chemokine Signaling	2		PP
Death Receptor Signaling	2		PP
D-myo-inositol (1,4,5,6)-Tetrakisphosphate Biosynthesis	2		PP
D-myo-inositol (3,4,5,6)-tetrakisphosphate Biosynthesis	2		PP
D-myo-inositol-5-phosphate Metabolism	2		PP
Histidine Degradation III	2		PP
Histidine Degradation VI	2		PP
Inhibition of Angiogenesis by TSP1	2		PP
PI3K Signaling in B Lymphocytes	2		PP
Pyridoxal 5'-phosphate Salvage Pathway	2		PP
Superpathway of Methionine Degradation	2		PP
TCA Cycle II (Eukaryotic)	2		PP
UVC-Induced MAPK Signaling	2		PP
Valine Degradation I	2		PP
Osteoarthritis Pathway	1.89737
Mouse Embryonic Stem Cell Pluripotency	1.88982	1.63299
Insulin Receptor Signaling	1.88982	1.34164
ILK Signaling	1.88982
Colorectal Cancer Metastasis Signaling	1.66667	1.88982
Type II Diabetes Mellitus Signaling	1.63299	2.23607	PV
Production of Nitric Oxide and Reactive Oxygen Species in Macrophages	1.34164	2.64575	PV
PI3K/AKT Signaling	1.34164	2.44949	PV
14-3-3-mediated Signaling	1.34164	2.23607	PV
AMPK Signaling	1.34164	1.88982
p38 MAPK Signaling	1.34164
Phospholipase C Signaling	1.34164
ERK/MAPK Signaling	1.1547	1.63299
CD27 Signaling in Lymphocytes	1
EIF2 Signaling	0.816497	1
Apoptosis Signaling	0.816497
Aryl Hydrocarbon Receptor Signaling	0.816497
eNOS Signaling	0.816497
Synaptic Long Term Potentiation	0.447214
cAMP-mediated signaling	0.377964	1
Protein Kinase A Signaling	0.27735	0.377964
Sirtuin Signaling Pathway	-0.727607	-0.447214
CDK5 Signaling	-0.816497
PPAR Signaling	-1
PTEN Signaling	-1.34164
PPARα/RXRα Activation	-1.41421	1.13389
Nicotine Degradation II		3.16228	PV
Estrogen Biosynthesis		3	PV
Melatonin Degradation I		3	PV
Nicotine Degradation III		3	PV
Superpathway of Melatonin Degradation		3	PV
Acetone Degradation I (to Methylglyoxal)		2.64575	PV
Bupropion Degradation		2.64575	PV
Glutathione-mediated Detoxification		2.64575	PV
IL-17A Signaling in Airway Cells		2.44949	PV
Role of NFAT in Regulation of the Immune Response		2.44949	PV
Serotonin Degradation		2.44949	PV
CD40 Signaling		2.23607	PV
CNTF Signaling		2.23607	PV
iCOS-iCOSL Signaling in T Helper Cells		2.23607	PV
IL-2 Signaling		2.23607	PV
IL-7 Signaling Pathway		2.23607	PV
JAK/Stat Signaling		2.23607	PV
NF-kB Signaling		2.23607	PV
PEDF Signaling		2.23607	PV
Th1 Pathway		2.23607	PV
Androgen Biosynthesis		2	PV
Bile Acid Biosynthesis, Neutral Pathway		2	PV
Fc Epsilon RI Signaling		2	PV
Fcγ Receptor-mediated Phagocytosis in Macrophages and Monocytes		2	PV
Glucocorticoid Biosynthesis		2	PV
GM-CSF Signaling		2	PV
IL-9 Signaling		2	PV
Leptin Signaling in Obesity		2	PV
Lymphotoxin β Receptor Signaling		2	PV
Macropinocytosis Signaling		2	PV
Mineralocorticoid Biosynthesis		2	PV
NF-κB Activation by Viruses		2	PV
Nitric Oxide Signaling in the Cardiovascular System		2	PV
Noradrenaline and Adrenaline Degradation		2	PV
Oxidative Ethanol Degradation III		2	PV
Retinoate Biosynthesis I		2	PV
Small Cell Lung Cancer Signaling		2	PV
Sphingosine-1-phosphate Signaling		2	PV
Tryptophan Degradation X (Mammalian, via Tryptamine)		2	PV
UVB-Induced MAPK Signaling		2	PV
Role of NANOG in Mammalian Embryonic Stem Cell Pluripotency		1.63299
Wnt/beta-catenin Signaling		1.13389
Amyotrophic Lateral Sclerosis Signaling		1
CD28 Signaling in T Helper Cells		1
Melanoma Signaling		1
Non-Small Cell Lung Cancer Signaling		1
SAPK/JNK Signaling		1
Telomerase Signaling		1
Huntington's Disease Signaling		0.447214
p53 Signaling		-0.447214
LPS/IL-1 Mediated Inhibition of RXR Function		-1

## Sheet: Tox Functions
Tox.Functions	PP z-score	PV z-score	Zonation
Necrosis of liver	0.40831	-2.30758	PP
Inflammation of liver	-0.0628695	-2.75783	PP
Cell death of liver cells	0.774815	-1.89623
Apoptosis of hepatocytes	0.835949	-1.54395
Increased activation of alkaline phosphatase	1.96396
Hepatic steatosis	-0.467082	-2.2461	PP
Cell death of hepatocytes		-1.61862
Development of hepatocellular carcinoma	0.0748831	-1.51647
Hepatic injury	0.57735	-0.958315
Hepatocellular carcinoma	0.113592	-1.34595
Proliferation of hepatocytes	1.089	-0.218218
Liver tumor	0.110933	-0.997981
Regeneration of liver	1
Liver cancer	-0.309492	-0.967612
Dysfunction of heart	0.617822
Apoptosis of liver cells	0.483622
Damage of kidney	-1	-1.41348
Failure of heart	-0.0628695
Liver carcinoma	-0.215041
Damage of liver	-1	-0.534721
Fibrosis of heart	-1.68902	-1
Injury of kidney	-1
Inflammation of heart	-1.18792
Cell death of cardiomyocytes	-1.43208
Failure of kidney	-1.88982
Increased Levels of Hematocrit		1.93449
Apoptosis of cardiomyocytes	-1.98248	-0.00807806
Increased Levels of Red Blood Cells		1.98052
Nephritis	-2.39452		PV

## Sheet: Upstream Regulators
Upstream.regulators	PP z-score	PV z-score	Zonation
INSR	2.77014	2.20043	PP
CD38	2.62109		PP
HNF1A	2.58494	2.39541
PI3K (complex)	2.40365		PP
IL4	2.28516		PP
RETNLB	2.23607	2
PPARD	2.21863	0.130189	PP
IGF1R	2.16366		PP
CEBPA	2.15556		PP
IL5	2.13767		PP
SMARCB1	2	1.88982
ATP7B	2		PP
LHX1	1.98248
EBF1	1.98248
PIK3R1	1.98248
ATF4	1.98248
MTOR	1.95083	0.301511
CREB1	1.94145
RB1	1.89737	0.447214
UCP1	1.88982
PPARGC1A	1.787	1.85819
ACOX1	1.66448	2.58465	PV
MYD88	1.66448	2.4327	PV
MYC	1.61551	2.21321	PV
NR3C1	1.56134
NFE2L2	1.49613	4.96885	PV
TP53	1.44115	1.4536
FOXM1	1.41421
HBA1/HBA2	1.34164
Hbb-b1	1.34164
ERK1/2	1.34164
EGR1	1.2679
PPARG	1.17892	1.45204
HIF1A	1.08197	1.94145
NR1I3	1.06749	3.25559	PV
Jnk	1.03617
CTNNB1	1	3.37534	PV
PLIN5	1
IL6	0.958315	-0.348228
STAT3	0.875667
HTT	0.762493
HDAC1	0.746729
IFNG	0.731793
NR1H4	0.691564	-1.71957
WNT3A	0.650945
TNF	0.600284	0.585206
CEBPB	0.569803	1.29987
NOTCH1	0.532152
IKBKB	0.447214	0.447214
IL10RA	0.377964	1.97566
MAPK9	0.293105
STAT1	-0.0678844
HNF4A	-0.218218	2.11948	PV
PTEN	-0.22522	-0.103695
AHR	-0.298275	2.57742	PV
LEP	-0.652753	2.41335	PV
IFNAR1	-0.762493
EGLN1	-0.990867
PPARA	-1.10302	-0.632456
IRS2	-1.1094
ERN1	-1.15404	-0.650945
ALDH2	-1.98248
INSIG1	-2	-1.96865
RICTOR	-2.52982	-3.31662	PP
KDM5A	-2.64575		PV
MAP4K4	-3.16228	-2.44949	PV
TCF7L2		3	PV
NFE2L1		2.6295	PV
SCAP		2.60709	PV
NR1I2		2.41751	PV
KMT2D		2.23607	PV
ABCB6		2.06081	PV
INHA		2	PV
MED1		2	PV
IKBKG		1.95083
CFTR		1.91237
XBP1		1.43208
MAPK14		1.1717
ZBTB20		1.13389
ADIPOQ		0.927173
Nr1h		0.282843
POR		-0.377964
CYP1A1		-0.447214
CYP1B1		-0.447214
CYP1A2		-0.447214
PRKAA1		-0.762493
PRKAA2		-0.762493
PML		-1.446
Vegf		-1.98248
HOXA10		-2	PP
ADRB		-2.44949	PP

## Sheet: Notes
Only pathways/functions/regulators yielding z-scores different from 0 are listed.
Positive z-scores indicate activation, negative z-scores indicate inhibition.
Cutoffs of a z-score of >2 in at least one hepatocyte population AND a z-score difference of >0.5 were used as a criteria for zonation of pathways/functions/regulators.
preferentially periportal pathway/function/regulator
preferentially perivenous pathway/function/regulator
